# Supplementary figures and images for: In Situ Characterization of Hfq Bacterial Amyloid: A Fourier-Transform Infrared Spectroscopy Study
Source: MDPI journal article supplement (doi:10.3390/pathogens8010036), 2019-03-18

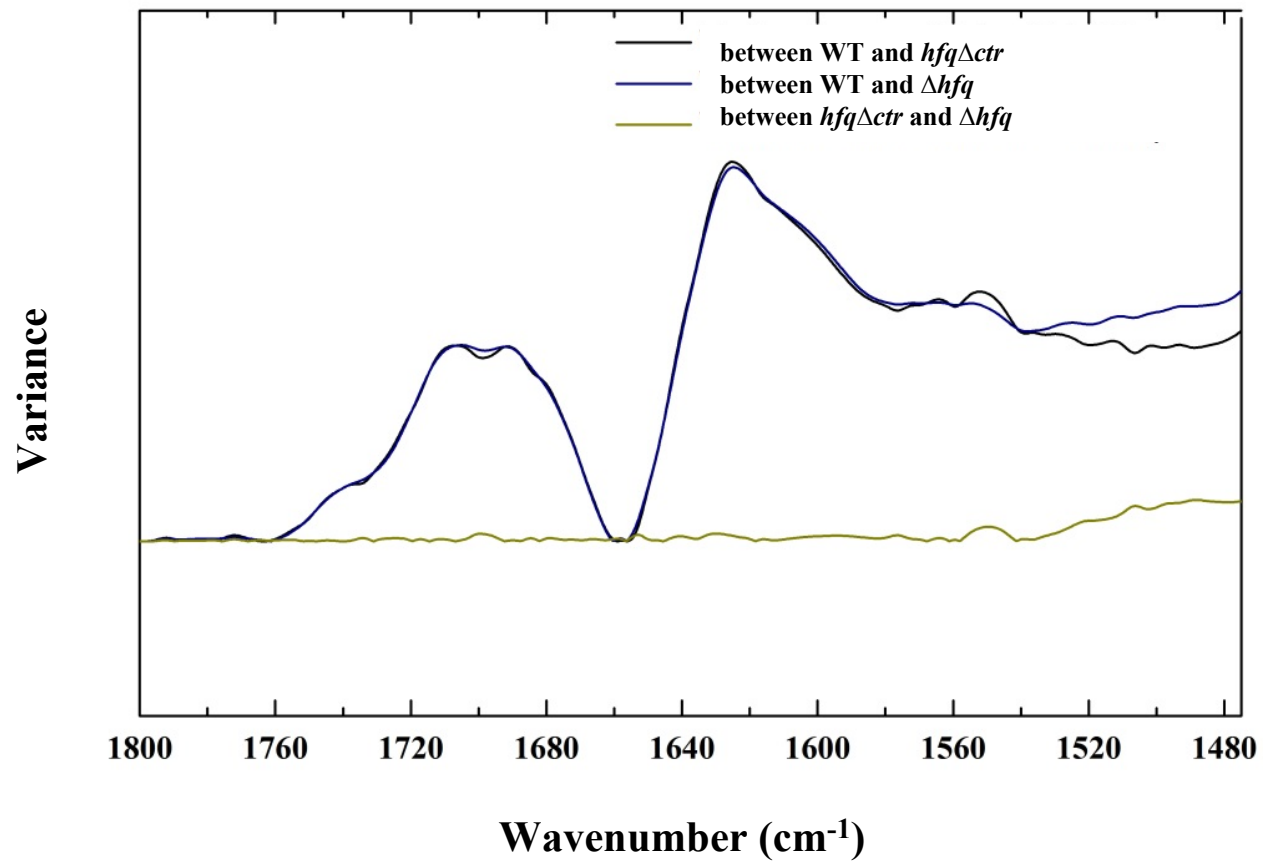

Supplement: s1 [file s1]

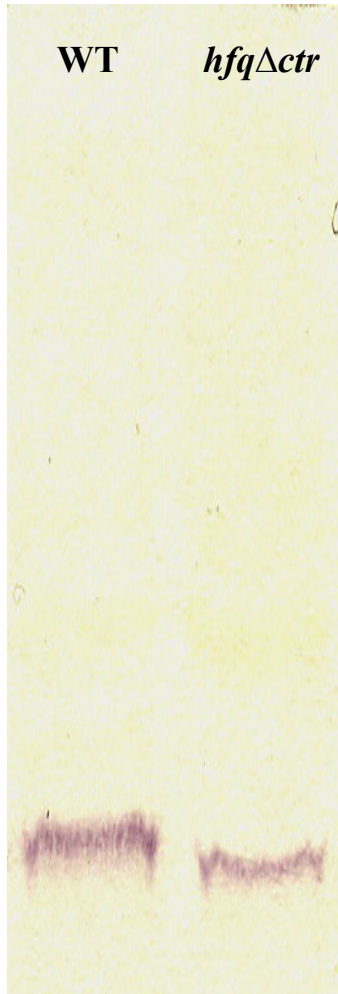

**Sup. Fig. S3:** Western blot were performed as described in (23)

Supplement: s1 [file s1]
